# Supplementary material
Source: MDPI journal article supplement (https://www.mdpi.com/2673-6373/4/2/18)
Supplement: s1 [file s1]

# Supplementary Materials: Variables Associated with Jaw Clicking in a South Australian Population: A Cross-Sectional Study

Taseef Hasan Farook \*, Lameesa Ramees and James Dudley

Adelaide Dental School, The University of Adelaide, Adelaide SA 5000, Australia;  
lameesa.ramees@adelaide.edu.au (L.R.); james.dudley@adelaide.edu.au (J.D.)

\* Correspondence: [taseef.farook@adelaide.edu.au](mailto:taseef.farook@adelaide.edu.au)

Table S1 the metadata of jaw kinematics synthesised from the 66 participants

| Treatment received | Maximum mouth opening | TMJ vibration integral difference | TMJ vibration frequency difference at >300Hz | Normalised temporalis muscle activity quotient | Normalised masseter muscle activity quotient | Normalised digastric muscle activity quotient |
|--------------------|-----------------------|-----------------------------------|----------------------------------------------|------------------------------------------------|----------------------------------------------|-----------------------------------------------|
| 1.00               | 51.60                 | 5.30                              | 0.60                                         | 0.20                                           | 0.18                                         | 0.18                                          |
| 1.00               | 60.40                 | 3.40                              | -2.40                                        | 0.14                                           | 0.13                                         | 0.13                                          |
| 1.00               | 58.60                 | 1.10                              | -0.40                                        | 0.16                                           | 0.14                                         | 0.13                                          |
| 1.00               | 48.60                 | -16.50                            | -2.30                                        | 0.10                                           | 0.08                                         | 0.07                                          |
| 1.00               | 46.40                 | 0.30                              | 0.10                                         | 0.12                                           | 0.09                                         | 0.09                                          |
| 1.00               | 53.10                 | -9.40                             | -1.30                                        | 0.15                                           | 0.12                                         | 0.12                                          |
| 1.00               | 43.50                 | 11.30                             | -0.30                                        | 0.14                                           | 0.12                                         | 0.11                                          |
| 1.00               | 43.90                 | 1.80                              | 0.50                                         | 0.11                                           | 0.09                                         | 0.10                                          |
| 1.00               | 37.90                 | -1.70                             | 0.00                                         | 0.09                                           | 0.07                                         | 0.08                                          |
| 1.00               | 60.50                 | 164.40                            | 65.70                                        | 0.08                                           | 0.06                                         | 0.06                                          |
| 1.00               | 42.00                 | -5.90                             | -0.40                                        | 0.14                                           | 0.13                                         | 0.12                                          |
| 1.00               | 48.50                 | -9.70                             | -4.10                                        | 0.12                                           | 0.11                                         | 0.11                                          |
| 1.00               | 41.40                 | 5.70                              | 0.60                                         | 0.08                                           | 0.06                                         | 0.06                                          |
| 1.00               | 43.30                 | 32.90                             | -0.40                                        | 0.12                                           | 0.11                                         | 0.10                                          |
| 1.00               | 33.70                 | 0.10                              | 0.00                                         | 0.22                                           | 0.20                                         | 0.20                                          |
| 1.00               | 57.00                 | 78.10                             | 1.50                                         | 0.12                                           | 0.10                                         | 0.10                                          |
| 1.00               | 44.70                 | -8.30                             | -0.20                                        | 0.05                                           | 0.08                                         | 0.08                                          |
| 1.00               | 45.60                 | -79.80                            | -1.80                                        | 0.12                                           | 0.10                                         | 0.09                                          |
| 1.00               | 49.50                 | -40.40                            | -1.90                                        | 0.16                                           | 0.14                                         | 0.14                                          |
| 1.00               | 43.20                 | 251.60                            | 62.00                                        | 0.15                                           | 0.14                                         | 0.13                                          |
| 1.00               | 49.80                 | 2.90                              | 0.10                                         | 0.11                                           | 0.09                                         | 0.09                                          |
| 1.00               | 48.30                 | 2.80                              | 0.50                                         | 0.12                                           | 0.10                                         | 0.09                                          |
| 1.00               | 53.40                 | 1.50                              | -0.20                                        | 0.19                                           | 0.17                                         | 0.17                                          |
| 1.00               | 64.40                 | -0.70                             | 0.30                                         | 0.09                                           | 0.07                                         | 0.07                                          |
| 1.00               | 53.40                 | -248.00                           | -16.00                                       | 0.23                                           | 0.21                                         | 0.20                                          |
| 1.00               | 48.90                 | -5.20                             | -0.80                                        | 0.10                                           | 0.08                                         | 0.09                                          |
| 1.00               | 46.90                 | -15.80                            | -12.70                                       | 0.10                                           | 0.07                                         | 0.07                                          |
| 1.00               | 51.40                 | 1.80                              | -0.20                                        | 0.12                                           | 0.11                                         | 0.10                                          |
| 1.00               | 56.40                 | 1.30                              | -0.10                                        | 0.19                                           | 0.17                                         | 0.17                                          |
| 1.00               | 50.10                 | -4.90                             | -0.60                                        | 0.12                                           | 0.10                                         | 0.11                                          |
| 1.00               | 29.60                 | 59.90                             | 0.70                                         | 0.12                                           | 0.09                                         | 0.11                                          |
| 1.00               | 38.20                 | 1.40                              | -0.60                                        | 0.09                                           | 0.07                                         | 0.08                                          |
| 1.00               | 48.70                 | 3.20                              | 0.30                                         | 0.15                                           | 0.13                                         | 0.13                                          |
| 1.00               | 43.60                 | -7.60                             | -0.40                                        | 0.23                                           | 0.21                                         | 0.20                                          |
| 2.00               | 40.40                 | -7.20                             | -0.20                                        | 0.21                                           | 0.19                                         | 0.20                                          |
| 2.00               | 51.20                 | -2.40                             | -0.90                                        | 0.12                                           | 0.10                                         | 0.10                                          |

|      |       |        |       |      |      |      |
|------|-------|--------|-------|------|------|------|
| 2.00 | 46.60 | -6.80  | -0.30 | 0.13 | 0.11 | 0.12 |
| 2.00 | 49.10 | 2.10   | 0.00  | 0.14 | 0.12 | 0.11 |
| 2.00 | 60.00 | -18.70 | -0.20 | 0.23 | 0.20 | 0.20 |
| 2.00 | 53.30 | -2.80  | -0.20 | 0.13 | 0.11 | 0.10 |
| 2.00 | 44.80 | 0.30   | -0.10 | 0.19 | 0.18 | 0.19 |
| 2.00 | 56.00 | -46.10 | -3.80 | 0.24 | 0.22 | 0.22 |
| 2.00 | 62.20 | -5.80  | -0.40 | 0.16 | 0.14 | 0.14 |
| 2.00 | 48.10 | -0.90  | 0.10  | 0.10 | 0.08 | 0.07 |
| 2.00 | 53.20 | -2.60  | -0.50 | 0.16 | 0.14 | 0.14 |
| 2.00 | 59.50 | 20.50  | 0.30  | 0.17 | 0.15 | 0.14 |
| 2.00 | 44.50 | -0.50  | -0.70 | 0.23 | 0.20 | 0.19 |
| 2.00 | 49.10 | 0.40   | 0.00  | 0.17 | 0.15 | 0.15 |
| 2.00 | 43.10 | -20.20 | -0.40 | 0.22 | 0.20 | 0.20 |
| 2.00 | 51.80 | -7.30  | -0.60 | 0.19 | 0.17 | 0.16 |
| 2.00 | 48.20 | 0.70   | 1.80  | 0.14 | 0.12 | 0.11 |
| 2.00 | 58.10 | 13.80  | 0.40  | 0.11 | 0.09 | 0.10 |
| 2.00 | 47.40 | 0.30   | 0.00  | 0.13 | 0.11 | 0.10 |
| 2.00 | 40.60 | 0.00   | 0.10  | 0.10 | 0.08 | 0.07 |
| 2.00 | 56.20 | -10.20 | -2.10 | 0.13 | 0.10 | 0.09 |
| 2.00 | 50.00 | -2.50  | 0.40  | 0.06 | 0.04 | 0.04 |
| 2.00 | 40.90 | 8.20   | 2.80  | 0.17 | 0.15 | 0.14 |
| 2.00 | 42.80 | -0.30  | 0.00  | 0.11 | 0.09 | 0.08 |
| 2.00 | 47.60 | -9.30  | -8.30 | 0.14 | 0.08 | 0.11 |
| 2.00 | 55.80 | -1.80  | -0.10 | 0.15 | 0.13 | 0.12 |
| 2.00 | 42.70 | -0.70  | 0.20  | 0.14 | 0.12 | 0.12 |
| 2.00 | 43.20 | 5.80   | -0.50 | 0.12 | 0.11 | 0.12 |
| 2.00 | 52.40 | -1.60  | 0.30  | 0.10 | 0.08 | 0.08 |
| 2.00 | 42.50 | 3.90   | 1.60  | 0.30 | 0.28 | 0.27 |
| 2.00 | 33.80 | -2.60  | -0.20 | 0.09 | 0.07 | 0.07 |
| 2.00 | 49.90 | 8.60   | 0.00  | 0.14 | 0.12 | 0.11 |

1 = occlusal therapy received, 2 = No occlusal therapy received
